# Supplementary material
Source: publisher figshare collection journal article supplement (https://karger.figshare.com/ndownloader/files/15122009)

Supplementary Figure 1. Concentration-response curve of NA and ACh in the pre-experiment. Different concentrations of NA and ACh were injected into 4 DS rats, including 2 DS rats fed low-salt (Rat number: TS-LS1 and TS-LS2) or high-salt (TS-HS1 and TS-HS2) diet for 6 weeks, the response of MSA were recorded and the concentration-response curve were described. As shown in the experiment, the dose of 10 ug/kg was chosen for both NA and ACh in all the experiments. LS: low salt diet group; HS: high salt diet group; MSA: mesenteric small artery; NA: noradrenaline; ACh: acetylcholine.


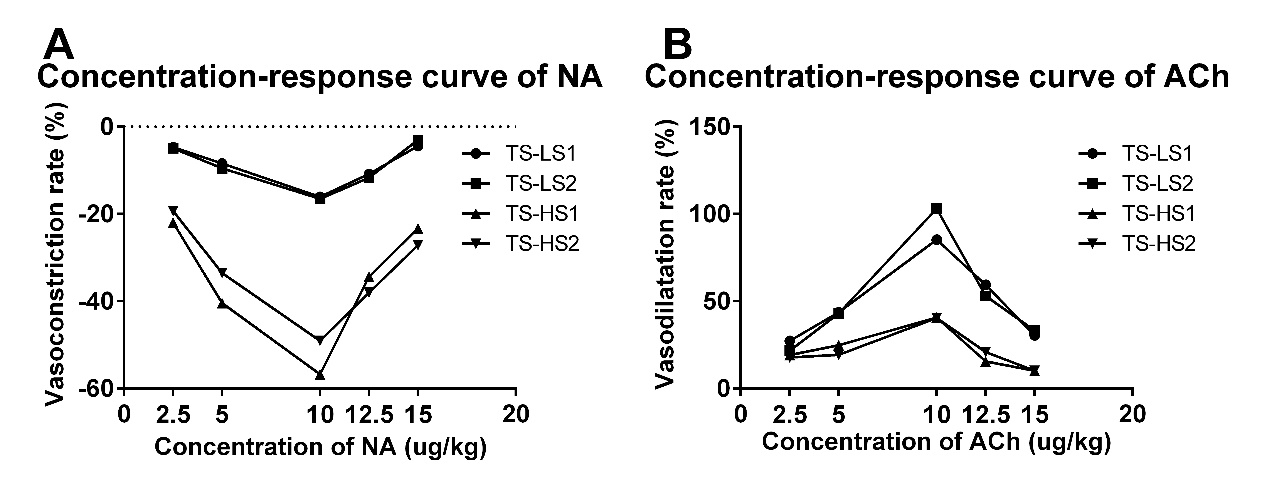

Supplement: Supplementary file 1 [file 15122009]
